# Supplementary material for: Developmental system drift in dorsoventral patterning is linked to transitions to autonomous development in Annelida
Source: bioRxiv preprint, doi:10.1101/2025.05.29.656861, version 1 (2025-06-01)
Supplement: Supplementary Table [file 656861_file02.xlsx]

## Sheet: Readme
Supplementary Table 1. Scoring of pSMAD1/5/8 immunoreactivity in blastula (6 hpf) of O. fusiformis embryos after U0126, DMH1, SB-431542, rBMP4 and rActivin A treatments.
Supplementary Table 2. Scoring of chordin and bmp2/4 expression in larvae of O. fusiformis after U0126 treatment.
Supplementary Table 3. Scoring of morphological phenotypes in larvae of O. fusiformis after DMH1, SB431542, rBMP4 and rActivin A treatments.
Supplementary Table 4. Scoring of morphological phenotypes in O. fusiformis larvae after different treatment windows with DMH1, SB431542, rBMP4 and rActivin A.
Supplementary Table 5. Scoring of cdx and gsc expression in larvae of O. fusiformis larvae after different treatment windows with DMH1, SB431542, rBMP4 and rActivin A.
Supplementary Table 6. Scoring of notch-like and BAMBI expression in O. fusiformis larvae after DMH1, SB-431542, rBMP4 and rActivin A treatment.
Supplementary Table 7. Number of differentially expressed genes in the blastula (6 hpf) of O. fusiformis after DMH1, SB431542, rBMP4 and rActivin A treatments.
Supplementary Table 8. Differentially upregulated genes in the blastula (6 hpf) of O. fusiformis after DMH1 treatment.
Supplementary Table 9. Differentially downregulated genes in the blastula (6 hpf) of O. fusiformis after DMH1 treatment.
Supplementary Table 10. Differentially upregulated genes in the blastula (6 hpf) of O. fusiformis after rBMP4 treatment.
Supplementary Table 11. Differentially downregulated genes in the blastula (6 hpf) of O. fusiformis after rBMP4 treatment.
Supplementary Table 12. Scoring of the expression of candidate genes at the blastula stage of O. fusiformis after DMH1 treatment.
Supplementary Table 13. Scoring of the expression of candidate genes at the blastula stage of O. fusiformis after rBMP4 and rActivin A treatment.
Supplementary Table 14. Scoring of the expression of candidate genes at the blastula stage of O. fusiformis after SB431542 treatment.
Supplementary Table 15. Scoring of syt1, elav1 and six3/6 expression in larvae of O. fusiformis after DMH1, SB431542, rBMP4 and rActivin A treatment.
Supplementary Table 16. Scoring of RYamide-like immunoreactivity in larvae of O. fusiformis after DMH1, SB431542, rBMP4 and rActivin A treatment.
Supplementary Table 17. Scoring of dp-ERK1/2 immunoreactivity in blastulae of S. lamarcki treated with U0126 and DMH1.
Supplementary Table 18. Scoring of pSMAD1/5/8 immunoreactivity in blastulae of S. lamarcki treated with U0126 and DMH1.
Supplementary Table 19. Differentially downregulated genes in 8.5 hpf embryos of P. dumerilii after DMH1 treatment.
Supplementary Table 20. Differentially upregulated genes in 8.5 hpf embryos of P. dumerilii after DMH1 treatment.
Supplementary Table 21. Differentially downregulated genes in 12 hpf embryos of P. dumerilii after DMH1 treatment.
Supplementary Table 22. Differentially upregulated genes in 12 hpf embryos of P. dumerilii after DMH1 treatment.
Supplementary Table 23. Differentially downregulated genes in 18 hpf embryos of P. dumerilii after DMH1 treatment.
Supplementary Table 24. Differentially upregulated genes in 18 hpf embryos of P. dumerilii after DMH1 treatment.
Supplementary Table 25. Differentially downregulated genes in 24 hpf embryos of P. dumerilii after DMH1 treatment.
Supplementary Table 26. Differentially upregulated genes in 24 hpf embryos of P. dumerilii after DMH1 treatment.
Supplementary Table 27. Differentially upregulated genes in the blastula (6 hpf) of O. fusiformis after SB431542 treatment.
Supplementary Table 28. Differentially downregulated genes in the blastula (6 hpf) of O. fusiformis after SB431542 treatment.
Supplementary Table 29. Differentially upregulated genes in the blastula (6 hpf) of O. fusiformis after rActivin A treatment.
Supplementary Table 30. Differentially downregulated genes in the blastula (6 hpf) of O. fusiformis after rActivin A treatment.
Supplementary Table 31. Scoring of morphological phenotypes of stage 5 and 7 larvae of C. teleta treated with SB431542.

## Sheet: Table S1
Species	Treatment	Total_n	pSmad1-5_positive	Note
Owenia_fusiformis	0.1% DMSO + 1x Mock	14	14
Owenia_fusiformis	10 uM U0126 + 1000 ng/ml rBMP	17	0
Owenia_fusiformis	10 uM U0126	5	0
Owenia_fusiformis	1000 ng/ml rBMP	9	9	BMP_everywhere
Owenia_fusiformis	0.4% DMSO	25	25
Owenia_fusiformis	40 uM SB431542	57	57
Owenia_fusiformis	0.2% DMSO	35	35
Owenia_fusiformis	10 uM U0126	63	0
Owenia_fusiformis	20 uM DMH1	47	0
Owenia_fusiformis	40 uM SB431542	74	74
Owenia_fusiformis	0.2% DMSO	7	7	Technical_rep1
Owenia_fusiformis	0.2% DMSO	13	13	Technical_rep2
Owenia_fusiformis	20 uM DMH1	14	0	Technical_rep1
Owenia_fusiformis	20 uM DMH1	22	0	Technical_rep2
Owenia_fusiformis	20 uM DMH1	13	0	Technical_rep3
Owenia_fusiformis	20 uM DMH1	12	0	Technical_rep4
Owenia_fusiformis	2x Mock	106	102
Owenia_fusiformis	1000 ng/ml rBMP	45	44	BMP_everywhere
Owenia_fusiformis	2000 ng/ml rBMP	70	66	BMP_everywhere

## Sheet: Table S2
Species	Treatment	Stage	Total_n	chordin	bmp2/4
Owenia_fusiformis	0.1% DMSO	6hp	763	349	414
Owenia_fusiformis	10 uM U0126	6hpf	195	129	66
Owenia_fusiformis	0.1% DMSO	24hpf	479	191	288
Owenia_fusiformis	10 uM U0126	24hpf	86	39	47

## Sheet: Table S3
Species	Treatment	Replica	Total_n	Normal	No_chaetae	Multiple_chaetae	Abnormal_proto-large_mouth	Underdeveloped	perc_phenotype	perc_underdevelop
Owenia_fusiformis	02DMSO	1	30	20	0	0	0	10	0.666667	0.333333
Owenia_fusiformis	02DMSO	2	33	15	0	0	0	18	0.454545	0.545455
Owenia_fusiformis	02DMSO	3	13	11	0	0	0	2	0.846154	0.153846
Owenia_fusiformis	20uMDMH1	1	35	0	29	0	0	6	0.828571	0.171429
Owenia_fusiformis	20uMDMH1	2	44	0	29	0	0	15	0.659091	0.340909
Owenia_fusiformis	20uMDMH1	3	16	0	13	0	0	3	0.8125	0.1875
Owenia_fusiformis	1xMock	1	40	36	0	0	0	4	0.9	0.1
Owenia_fusiformis	1xMock	2	100	68	0	0	0	32	0.68	0.32
Owenia_fusiformis	1xMock	3	19	14	0	0	0	5	0.736842	0.263158
Owenia_fusiformis	1000BMP	1	41	0	0	39	0	2	0.95122	0.0487805
Owenia_fusiformis	1000BMP	2	41	0	0	30	0	11	0.731707	0.268293
Owenia_fusiformis	1000BMP	3	18	0	0	16	0	2	0.888889	0.111111
Owenia_fusiformis	75Activin	1	40	1	0	37	0	2	0.925	0.05
Owenia_fusiformis	75Activin	2	43	0	0	27	0	16	0.627907	0.372093
Owenia_fusiformis	75Activin	3	19	0	0	17	0	2	0.894737	0.105263
Owenia_fusiformis	04DMSO	1	36	26	0	0	0	10	0.722222	0.277778
Owenia_fusiformis	04DMSO	2	33	21	0	0	0	12	0.636364	0.363636
Owenia_fusiformis	04DMSO	3	18	12	0	0	0	6	0.666667	0.333333
Owenia_fusiformis	40SB	1	34	0	0	0	24	10	0.705882	0.294118
Owenia_fusiformis	40SB	2	28	0	0	0	20	8	0.714286	0.285714
Owenia_fusiformis	40SB	3	13	0	0	0	9	4	0.692308	0.307692

## Sheet: Table S4
Species	Treatment	Time_window	Total_n	Normal	No_chaetae	Multiple_chaetae	Abnormal_proto-large_mouth	Note
Owenia_fusiformis	0.2% DMSO	0.5hpf-to-4-cell	17	17	0	0	0
Owenia_fusiformis	20 uM DMH1	0.5hpf-to-4-cell	13	0	13	0	0
Owenia_fusiformis	20 uM SB431542	0.5hpf-to-4-cell	121	121	0	0	0
Owenia_fusiformis	1x Mock	0.5hpf-to-4-cell	19	19	0	0	0
Owenia_fusiformis	1000 ng/ml rBMP	0.5hpf-to-4-cell	85	0	0	85	0
Owenia_fusiformis	75 ng/ml rActivin A	0.5hpf-to-4-cell	29	29	0	0	0
Owenia_fusiformis	0.2% DMSO	0.5hpf-to-8-cell	16	16	0	0	0
Owenia_fusiformis	20 uM DMH1	0.5hpf-to-8-cell	13	0	13	0	0
Owenia_fusiformis	20 uM SB431542	0.5hpf-to-8-cell	17	17	0	0	0
Owenia_fusiformis	1x Mock	0.5hpf-to-8-cell	157	157	0	0	0
Owenia_fusiformis	1000 ng/ml rBMP	0.5hpf-to-8-cell	41	0	0	41	0
Owenia_fusiformis	75 ng/ml rActivin A	0.5hpf-to-8-cell	143	10	0	133	0
Owenia_fusiformis	0.2% DMSO	0.5hpf-to-3hpf	16	16	0	0	0
Owenia_fusiformis	20 uM DMH1	0.5hpf-to-3hpf	11	0	0	0	11
Owenia_fusiformis	20 uM SB431542	0.5hpf-to-3hpf	11	0	0	0	0
Owenia_fusiformis	1x Mock	0.5hpf-to-3hpf	40	40	0	0	0
Owenia_fusiformis	1000 ng/ml rBMP	0.5hpf-to-3hpf	27	0	0	27	0
Owenia_fusiformis	75 ng/ml rActivin A	0.5hpf-to-3hpf	77	0	0	77	0
Owenia_fusiformis	0.2% DMSO	0.5hpf-to-4hpf	8	8	0	0	0
Owenia_fusiformis	20 uM DMH1	0.5hpf-to-4hpf	56	0	56	0	0
Owenia_fusiformis	20 uM SB431542	0.5hpf-to-4hpf	11	0	0	0	11
Owenia_fusiformis	1x Mock	0.5hpf-to-4hpf	59	59	0	0	0
Owenia_fusiformis	1000 ng/ml rBMP	0.5hpf-to-4hpf	43	0	0	43	0
Owenia_fusiformis	75 ng/ml rActivin A	0.5hpf-to-4hpf	47	0	0	47	0
Owenia_fusiformis	0.2% DMSO	6hpf-to-24hpf	29	29	0	0	0
Owenia_fusiformis	20 uM DMH1	6hpf-to-24hpf	10	10	0	0	0
Owenia_fusiformis	20 uM SB431542	6hpf-to-24hpf	15	15	0	0	0
Owenia_fusiformis	1x Mock	6hpf-to-24hpf	34	34	0	0	0
Owenia_fusiformis	1000 ng/ml rBMP	6hpf-to-24hpf	37	37	0	0	0
Owenia_fusiformis	75 ng/ml rActivin A	6hpf-to-24hpf	28	24	0	4	0

## Sheet: Table S5
Species	Treatment	Total_n	cdx	gsc	Notes
Owenia_fusiformis	0.2% DMSO	133	76	57
Owenia_fusiformis	20uM DMH1	8	6	2
Owenia_fusiformis	1x Mock	16	11	5
Owenia_fusiformis	1000 ng/ml rBMP	13	4	9
Owenia_fusiformis	0.2% DMSO	417	139	278	Different plate
Owenia_fusiformis	20uM DMH1	505	268	237	Different plate
Owenia_fusiformis	1x Mock	218	125	93	Same 1x Mock control as the rActivin treatment
Owenia_fusiformis	1000 ng/ml rBMP	232	95	137	Different plate
Owenia_fusiformis	0.4% DMSO	39	20	19
Owenia_fusiformis	40uM SB431542	98	48	50
Owenia_fusiformis	1x Mock	34	11	23
Owenia_fusiformis	75 ng/ml rActivin A	21	12	9
Owenia_fusiformis	0.4% DMSO	572	245	327	Diff_plate
Owenia_fusiformis	40uM SB431542	267	48	219	Diff_plate
Owenia_fusiformis	1x Mock	NA	NA	NA	Mock is the same as the rBMP treatemnt
Owenia_fusiformis	75 ng/ml rActivin A	122	30	92	Diff_plate

## Sheet: Table S6
Species	Treatment	Total_n	notch-like	BAMBI
Owenia_fusiformis	0.2% DMSO	26	18	8
Owenia_fusiformis	20uM DMH1	17	8	9
Owenia_fusiformis	40uM SB431542	66	43	23
Owenia_fusiformis	1x Mock	78	62	16
Owenia_fusiformis	1000 ng/ml rBMP	44	35	9
Owenia_fusiformis	75 ng/ml rActivin A	136	87	49

## Sheet: Table S7
Species	Pair-wise	down	up
Owenia_fusiformis	02_DMSO_vs_DMH1	19	12
Owenia_fusiformis	Mock_vs_BMP	53	68
Owenia_fusiformis	04_DMSO_vs_SB	41	27
Owenia_fusiformis	Mock_vs_activin	1295	998
Owenia_fusiformis	Mock_vs_BMP_vs_activin	38	22

## Sheet: Table S8
Gene_ID	mean	log2FoldChange	lfcSE	stat	pvalue	padj
OFUSG01032.4	699.915	0.666342	0.123274	5.42479	5.80242e-08	4.97046e-05
OFUSG01143.1	971.142	0.504958	0.123128	4.30153	1.69622e-05	0.00549326
OFUSG07501.5	540.436	0.674714	0.120425	5.86964	4.36744e-09	5.89338e-06
OFUSG08474.1	259.837	0.705274	0.0995415	8.89438	5.87472e-19	3.56728e-15
OFUSG09772.2	290.695	0.592464	0.107986	6.17403	6.657e-10	1.07795e-06
OFUSG10355.1	2130.31	0.50347	0.124093	3.83974	0.000123166	0.025569
OFUSG13298.2	1189.5	0.589475	0.122749	5.15941	2.47729e-07	0.000161977
OFUSG16391.1	12213.3	0.538037	0.0807231	6.66115	2.71692e-11	5.9992e-08
OFUSG18429.1	137559	0.574362	0.0515551	11.1407	7.95185e-29	9.65713e-25
OFUSG19285.1	342.568	0.517651	0.0894566	8.06039	7.60494e-16	3.07861e-12
OFUSG26253.2	251.73	0.670696	0.0974376	7.49329	6.71664e-14	2.03926e-10
OFUSG26959.3	215.298	0.647787	0.0973841	9.28877	1.56076e-20	1.26365e-16

## Sheet: Table S9
transcript_id	mean	log2FoldChange	lfcSE	stat	pvalue	padj
OFUSG04687.1	679.961	-1.37045	0.123257	-11.9122	1.0229e-32	2.48453e-28
OFUSG05666.1	1282.09	-0.541194	0.122969	-4.41913	9.9101e-06	0.00388236
OFUSG06621.1	4754.33	-0.537695	0.0960807	-5.59452	2.21228e-08	2.12427e-05
OFUSG06854.3	376.082	-0.596849	0.115226	-5.4147	6.13915e-08	4.97046e-05
OFUSG07945.2	3331.44	-0.507445	0.105477	-4.80758	1.52769e-06	0.000757267
OFUSG08512.2	1646.2	-0.52807	0.120622	-4.36387	1.27782e-05	0.00456427
OFUSG09704.2	1510.41	-0.559856	0.121174	-4.63505	3.56858e-06	0.00154781
OFUSG11344.1	5026.56	-0.518398	0.0927371	-5.58975	2.27391e-08	2.12427e-05
OFUSG12735.1	2887.15	-0.582735	0.109861	-5.32044	1.03514e-07	7.85706e-05
OFUSG13298.1	939.78	-0.758953	0.12372	-6.20693	5.40301e-10	9.37383e-07
OFUSG16561.1	1807.5	-0.50836	0.123806	-4.1535	3.27423e-05	0.00914114
OFUSG17182.1	10951.6	-0.575701	0.0756406	-7.6108	2.72407e-14	9.45213e-11
OFUSG17248.2	2328.2	-0.688966	0.112302	-6.12456	9.09326e-10	1.38041e-06
OFUSG17661.2	1406.98	-0.631518	0.121725	-5.22678	1.72489e-07	0.000123223
OFUSG19170.2	2702.82	-0.692044	0.116497	-6.04746	1.47144e-09	2.10234e-06
OFUSG19375.2	1463.34	-0.502958	0.124199	-4.14193	3.44389e-05	0.00950552
OFUSG20191.1	2136.7	-0.565544	0.11567	-4.9026	9.45777e-07	0.000510488
OFUSG21500.1	449.501	-0.799899	0.111434	-8.40126	4.41721e-17	2.14579e-13
OFUSG25600.1	3928.32	-0.50274	0.100808	-4.9887	6.07867e-07	0.00034336

[truncated: 22 more sheets: Table S10, Table S11, Table S12, Table S13, Table S14, Table S15, Table S16, Table S17, Table S18, Table S19, Table S20, Table S21, Table S22, Table S23, Table S24, Table S25, Table S26, Table S27, Table S28, Table S29 …]
